# Supplementary material
Source: MDPI journal article supplement (https://www.mdpi.com/2073-4344/13/6/947)
Supplement: s1 [file s1 › catalysts-2349536-supplementary.pdf]

*Supplementary information for*

**Two-in-one electrons trapped Fe-BiOCl-V<sub>o</sub> nanosheets for promoting photocatalytic-Fenton degradation performances of phenol**

Jinlin Long, Suizhao Zhang, Donghao Xia, Qi Wan, Yu Wan, Meiqiu Nong, Zhaohui Wu

**Figure S1.** Elemental mapping and EDS spectrum of Fe-BiOCl-V<sub>o</sub> nanosheets.

**Figure S2.** MS plots of different samples.

**Figure S3.** Concentration of Fe<sup>2+</sup>.

**Figure S4.** Comparison of the Fenton, photocatalytic, and photocatalytic-Fenton performances of phenol over Fe-BiOCl-V<sub>o</sub> nanosheets.

**Figure S5.** Comparison of XRD patterns and SEM images of Fe-BiOCl-V<sub>o</sub> nanosheets before and after reaction.

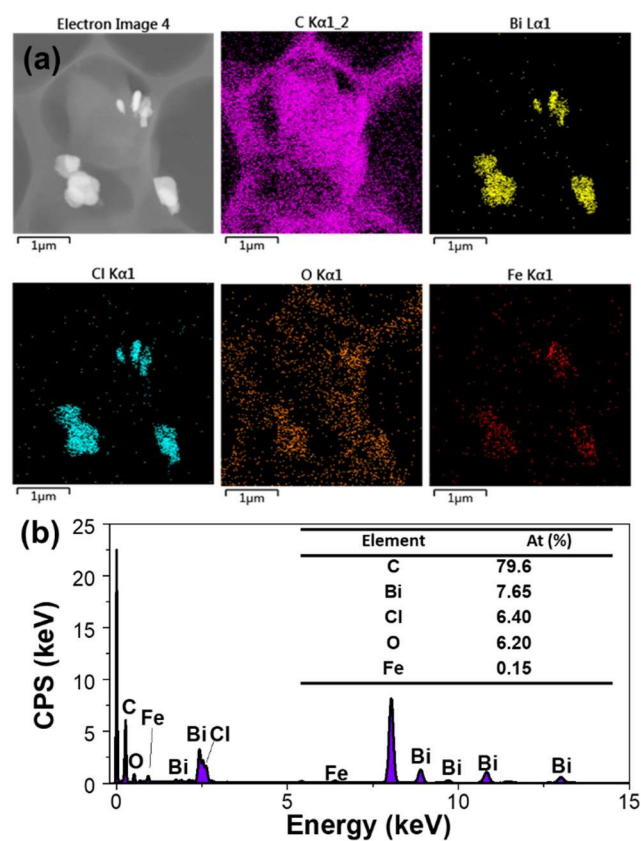

**Figure S1.** (a) Bright-field TEM image and corresponding elemental mapping, and (b) corresponding EDS spectrum of Fe-BiOCl-V<sub>o</sub> nanosheets.

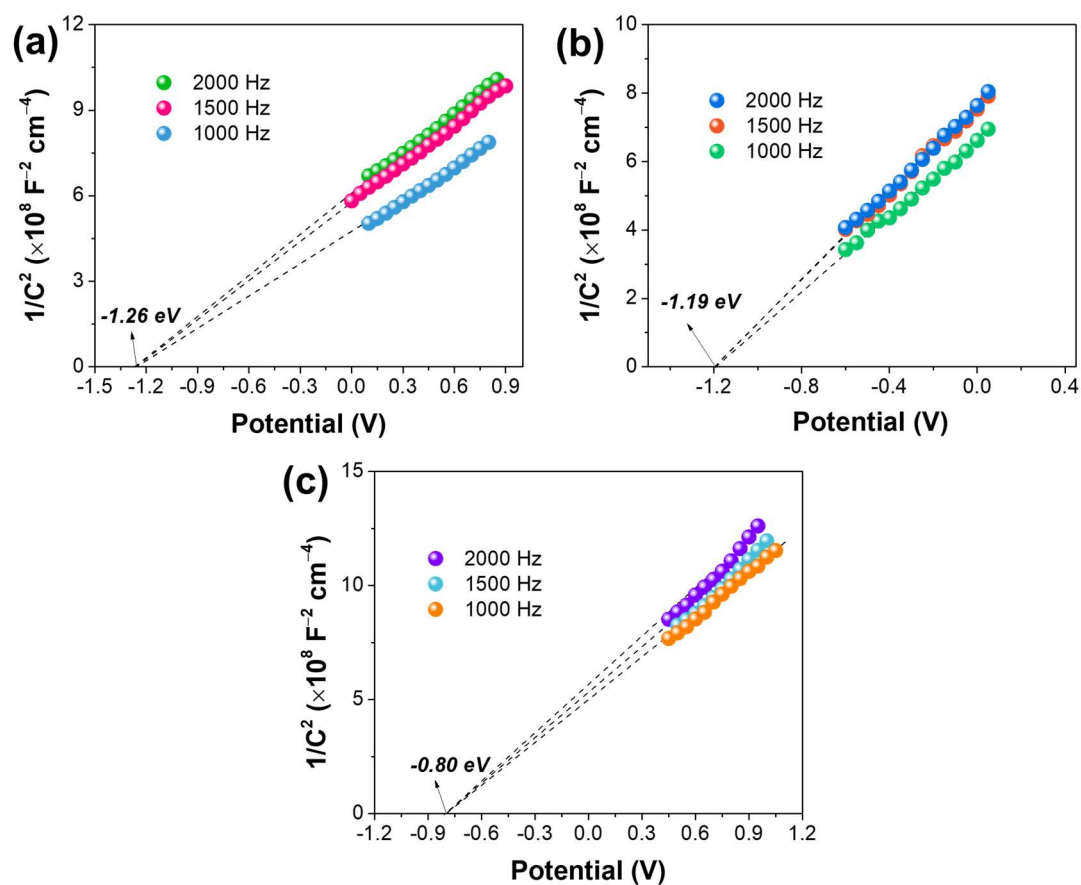

**Figure S2.** MS plots of different samples, (a) BiOCl, (b) BiOCl- $V_o$ , and (c) Fe-BiOCl- $V_o$ .

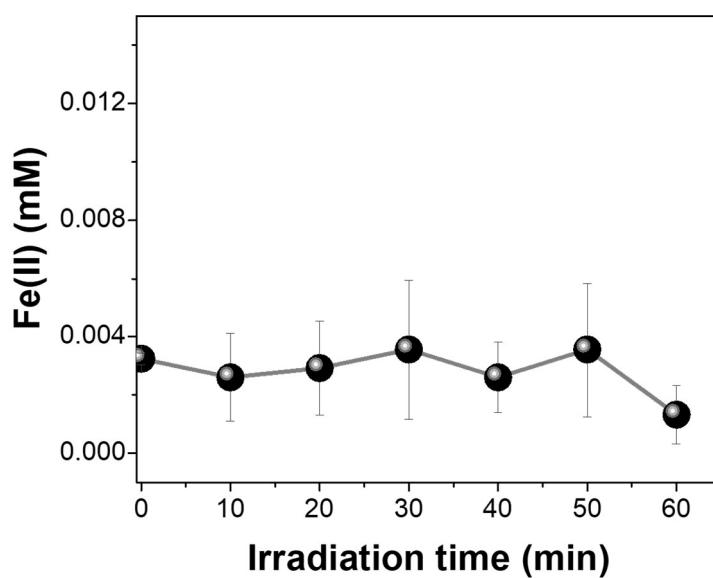

**Figure S3.** Concentration of  $\text{Fe}^{2+}$  in the photocatalytic-Fenton system of Fe-BiOCl- $V_o$  nanosheets.

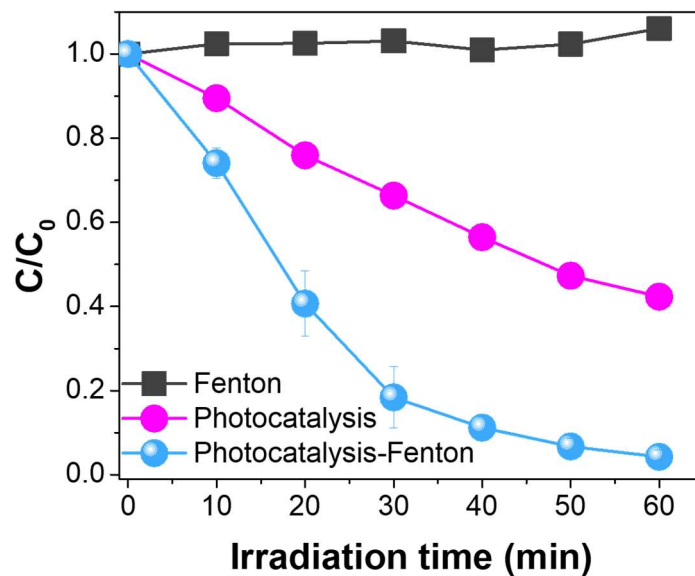

**Figure S4.** Comparison of the Fenton, photocatalytic, and photocatalytic-Fenton performances of phenol over Fe-BiOCl-V<sub>o</sub> nanosheets under full light spectra.

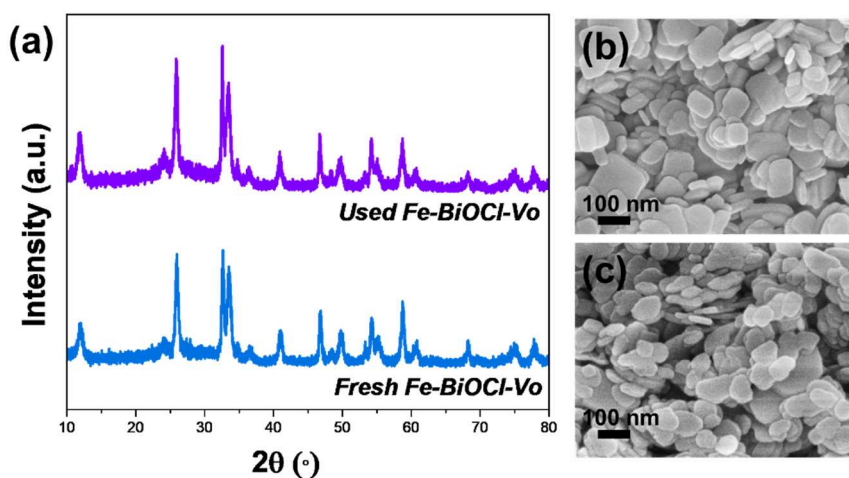

**Figure S4.** (a) Comparison of XRD patterns of Fe-BiOCl-V<sub>o</sub> nanosheets before (Fresh Fe-BiOCl-V<sub>o</sub>) and after (Used Fe-BiOCl-V<sub>o</sub>) photocatalytic-Fenton process. SEM images of (b) fresh and (c) used Fresh Fe-BiOCl-V<sub>o</sub> nanosheets.
